# Supplementary material for: Serum N-Glycosylation RPLC-FD-MS Assay to Assess Colorectal Cancer Surgical Interventions
Source: Biomolecules. 2023 May 27;13(6):896. doi: 10.3390/biom13060896 (PMC10295937; doi:10.3390/biom13060896)
Supplement: Supplementary file 1 [file biomolecules-13-00896-s001.zip › 03_CRC_SI_mm2_09May23.xlsx]

## Sheet: Table of Contents
Supplementary Materials
Serum N-glycosylation RPLC-FD-MS Assay to Assess Colorectal Cancer Surgical Interventions
Alan B. Moran1,2, Georgia Elgood-Hunt2, Yuri E.M. van der Burgt1, Manfred Wuhrer1, Wilma E. Mesker3, Rob A.E.M. Tollenaar3, Daniel I.R. Spencer2, Guinevere S.M. Lageveen-Kammeijer1,4 *
1	Leiden University Medical Center, Center for Proteomics and Metabolomics, 2300 RC Leiden, The Netherlands
2	Ludger Ltd., Culham Science Centre, OX14 3EB Abingdon, United Kingdom
3	Leiden University Medical Center, Department of Surgery, 2300 RC Leiden, The Netherlands
4	University of Groningen, Department of Analytical Biochemistry, Groningen Research Institute of Pharmacy, Groningen, The Netherlands
*	Correspondence: Guinevere S.M. Lageveen-Kammeijer, Leiden University Medical Center, Center for Proteomics and Metabolomics, P.O. Box 9600, 2300 RC Leiden, The Netherlands and University of Groningen, Department of Analytical Biochemistry, Groningen Research Institute of Pharmacy, 9713 AV Groningen, The Netherlands; g.s.m.kammeijer@rug.nl
Table of Contents
Table S1. Diagnostic ions obtained by RPLC-FD-MS(-MS)
Table S2. HappyTools peak extraction and calibration parameters
Table S3. LaCyTools composition extraction and calibration parameters
Table S4. Formulas for calculating derived glycosylation traits
Table S5. Analysis of CRC cohort using three quantification methods
Table S6. Comparison of RPLC-FD-MS and MALDI-MS direct N-glycan trait results
Table S7. Comparison of RPLC-FD-MS and MALDI-MS derived glycosylation trait results
Table S8. Diagnostic performance of RPLC- (FD, MS, FD-MS) and MALDI-MS results for discriminating CRC disease categories
Table S9. Clinical characteristics of the discovery and validation CRC cohort

## Sheet: Table S1
				Supplementary Table S1: Diagnostic ions obtained by RPLC-FD-MS(-MS). The mass of N-glycans following procainamide-labeling and sialic acid derivatization is shown. The analysis and scan numbers (#) are provided for the MS/MS spectra used to carry out the assignment [1]. The proposed structures of diagnostic ions at specific m/z are illustrated. Abbreviations: hexose (H), N-acetylhexosamine (N), f…
				MS2 confirmed	Diagnostic fragment ions
					Sialic acid	Sialic acid	Fucose	Fucose	N-acetylglucosamine
					α2,3	α2,6	Antenna	Core	Bisection
RPLC peak #	Composition	M	Glycan	Analysis #; Scan #	m/z 656.26	m/z 685.25	m/z 512.20	m/z 587.33	m/z 1009.48	m/z 1155.54
12	H5N4F1S2,31	2295.93		#9789; #1276	656.3			587.25
13	H5N4F1S2,32	2586.04		#9789; #1305	656.18			587.34
15	H5N5F1S2,31	2499.01		#9789; #1381	656.17			587.3		n.d.
18	H6N5F1S2,31S2,61	2980.19		#9828; 1498	656.38	685.5	512.09
18	H6N5S2,61	2544.02		#10323; #822		685.23
22	H5N5F1S2,31S2,61	2818.14		#9789; #1657	656.2	685.25		587.34		1155.63
23	H5N5F1S2,61_iso1	2528.03		#9789; #1698		685.18		587.35		1155.13
25	H6N5F1S2,31S2,62_iso1	3299.32		#9828; #1737	656.25	685.25	512.18
30	H7N6S2,31S2,63	3837.52		#9789; #1928	656.14	685.32
30	H6N5F1S2,62	3009.21		#9828; #1940		685.19		587.38
30	H6N5F1S2,31S2,62_iso2	3299.32		#9828; #1938	656.26	685.21		587.29

## Sheet: Table S2
Supplementary Table S2: HappyTools peak extraction and calibration parameters. Peaks selected for calibration were used to perform retention time calibration.
Peak #	Time (min)	Integration Window (± min)	Calibrant	Calibration Window (± min)
1	8.28081	0.110781	x	0.5
2	8.60153	0.104077
3	8.97703	0.112983
4	9.30786	0.0813664
5	10.4787	0.0834153
6	11.8465	0.084515	x	0.5
7	12.126	0.0945884
8	14.0064	0.05
9	14.154	0.05
10	14.5583	0.0739032
11	14.715	0.0734294
12	14.951	0.0868584
13	15.3037	0.085955
14	16.0215	0.15
15	16.2859	0.0976154
16	16.5661	0.118329
17	16.8379	0.15
18	17.6271	0.122361
19	17.9302	0.15	x	0.5
20	18.2129	0.0884945
21	19.1334	0.120559
22	19.4931	0.104338
23	19.9002	0.144474
24	20.1832	0.0767962
25	20.4823	0.15
26	20.7695	0.0690617
27	21.0306	0.0689898	x	0.5
28	21.2436	0.05
29	21.4618	0.0764846
30	22.7606	0.090584
31	23.0547	0.0695913	x	0.5
32	23.7836	0.0744689
33	23.9112	0.0748496

## Sheet: Table S3
Supplementary Table S3: LaCyTools composition extraction and calibration parameters. Compositions selected for calibration were used to perform mass calibration for retention time (RT) clusters. Specific m/z were also selected to perform alignment of the entire spectra. Abbreviations: hexose (H), N-acetylhexosamine (N), fucose (F), α2,3-linked N-acetylneuraminic acid amidated (Am), α2,6-linked N-…
# Peak	RT (sec)	Mass Window	Time Window (± sec)	Min Charge	Max Charge	Calibrant	Alignment m/z	Alignment (sec)
PROC1H9N2	540	0.1	40	2	3	x	1051.87	509
PROC1H8N2	540	0.1	40	2	3	x
PROC1H7N2	540	0.1	40	2	2	x
PROC1H6N2	540	0.1	40	2	2	x
PROC1H5N2	695	0.1	60	2	2	x	727.794	644
PROC1H4N4	695	0.1	60	2	2
PROC1H5N4	695	0.1	60	2	2	x	930.856	727
PROC1H5N4Am1	695	0.1	60	2	3	x
PROC1H5N4Am2	695	0.1	60	2	3	x
PROC1H3N5	900	0.1	50	2	2
PROC1H4N5	900	0.1	50	2	3
PROC1H5N4F1	900	0.1	50	2	3	x
PROC1H4N4F1	900	0.1	50	2	3	x	922.865	893
PROC1H3N4F1	900	0.1	50	2	2	x
PROC1H5N4F1Am1	900	0.1	50	2	3
PROC1H5N4F1Am2	900	0.1	50	2	3
PROC1H5N4Am1E1_iso1	1010	0.1	40	2	3	x	823.985	978
PROC1H5N4E1_iso1	1010	0.1	40	2	3	x
PROC1H5N5F1Am1	1010	0.1	40	2	3
PROC1H6N5Am2E1	1010	0.1	40	2	3
PROC1H6N5Am1E1_iso1	1010	0.1	40	2	3
PROC1H3N5F1	1010	0.1	40	2	3
PROC1H5N5F1	1010	0.1	40	2	3
PROC1H4N5F1	1010	0.1	40	2	3	x
PROC1H6N5E1	1120	0.1	65	2	3
PROC1H6N5F1Am1E1	1120	0.1	65	2	3
PROC1H5N3E1	1120	0.1	65	2	3
PROC1H5N4E1_iso2	1120	0.1	65	2	3	x	1090.42	1094
PROC1H6N5Am1E1_iso2	1120	0.1	65	2	3	x
PROC1H5N4Am1E1_iso2	1120	0.1	65	2	3	x
PROC1H5N5E1	1120	0.1	65	2	3		794.98	1169
PROC1H5N5F1Am1E1	1215	0.1	40	2	3
PROC1H5N5F1E1_iso1	1215	0.1	40	2	3
PROC1H6N5Am1E2_iso1	1215	0.1	40	2	3
PROC1H5N4F1E1	1215	0.1	40	2	3	x
PROC1H5N4F1Am1E1	1215	0.1	40	2	3	x
PROC1H6N5F1Am1E2_iso1	1215	0.1	40	3	3	x
PROC1H6N5E2_iso1	1215	0.1	40	2	3
PROC1H6N5Am1E2_iso2	1292	0.1	40	2	3	x
PROC1H5N4E2	1292	0.1	40	2	3	x	833.653	1286
PROC1H6N5E2_iso2	1292	0.1	40	2	3	x
PROC1H5N5F1E1_iso2	1292	0.1	40	2	3	x
PROC1H7N6Am1E3	1365	0.1	25	3	4	x
PROC1H6N5F1Am1E2_iso2	1365	0.1	25	3	3	x
PROC1H6N5F1E2	1365	0.1	25	3	3	x
PROC1H5N4F1E2	1435	0.1	35	2	3	x	882.326	1407
PROC1H6N5E3	1435	0.1	35	3	3	x	1061.72	1453
PROC1H5N5F1E2	1435	0.1	35	2	3	x

## Sheet: Table S4
Supplementary Table S4: Formulas for calculating derived glycosylation traits. The formulas for calculating derived glycosylation traits are shown. The relative abundances of isomeric structures were summed in order to perform the derived trait calculation. Some derived traits required pre-calculated traits in order to be determined, which are also shown. N-glycan abbreviations: hexose (H), N-ace…
Type	Trait	Formula
Pre-calculation	CA2	CA2 = ( H3N4F1 + H3N5 + H3N5F1 + H4N4 + H4N4F1 + H4N5 + H4N5F1 + H5N4 + H5N4Am1 + H5N4Am1E1 + H5N4Am2 + H5N4E1 + H5N4E2 + H5N4F1 + H5N4F1Am1 + H5N4F1Am1E1 + H5N4F1Am2 + H5N4F1E1 + H5N4F1E2 + H5N5E1 + H5N5F1 + H5N5F1Am1 + H5N5F1Am1E1 + H5N5F1E1 + H5N5F1E2 ) / ( H3N4F1 + H3N5 + H3N5F1 + H4N4 + H4N4F1 + H4N5 + H4N5F1 + H5N4 + H5N4Am1 + H5N4Am1E1 + H5N4Am2 + H5N4E1 + H5N4E2 + H5N4F1 + H5N4F1Am1 + H5N…
	CA3	CA3 = ( H6N5Am1E1 + H6N5Am1E2 + H6N5Am2E1 + H6N5E1 + H6N5E2 + H6N5E3 + H6N5F1Am1E1 + H6N5F1Am1E2 + H6N5F1E2 ) / ( H3N4F1 + H3N5 + H3N5F1 + H4N4 + H4N4F1 + H4N5 + H4N5F1 + H5N4 + H5N4Am1 + H5N4Am1E1 + H5N4Am2 + H5N4E1 + H5N4E2 + H5N4F1 + H5N4F1Am1 + H5N4F1Am1E1 + H5N4F1Am2 + H5N4F1E1 + H5N4F1E2 + H5N5E1 + H5N5F1 + H5N5F1Am1 + H5N5F1Am1E1 + H5N5F1E1 + H5N5F1E2 + H6N5Am1E1 + H6N5Am1E2 + H6N5Am2E1 + …
	A1FE	A1FE = ( 0/1 * (0) + 1/1 * (0) ) / (0)
	A2FE	A2FE = ( 0/2 * ( H3N4F1 + H3N5F1 + H4N4F1 + H4N5F1 + H5N4F1 + H5N4F1Am1 + H5N4F1Am2 + H5N5F1 + H5N5F1Am1 ) + 1/2 * ( H5N4F1Am1E1 + H5N4F1E1 + H5N5F1Am1E1 + H5N5F1E1 ) + 2/2 * ( H5N4F1E2 + H5N5F1E2 ) ) / ( H3N4F1 + H3N5F1 + H4N4F1 + H4N5F1 + H5N4F1 + H5N4F1Am1 + H5N4F1Am1E1 + H5N4F1Am2 + H5N4F1E1 + H5N4F1E2 + H5N5F1 + H5N5F1Am1 + H5N5F1Am1E1 + H5N5F1E1 + H5N5F1E2 )
	A1F0E	A1F0E = ( 0/1 * (0) + 1/1 * (0) ) / (0)
	A2F0E	A2F0E = ( 0/2 * ( H3N5 + H4N4 + H4N5 + H5N4 + H5N4Am1 + H5N4Am2 ) + 1/2 * ( H5N4Am1E1 + H5N4E1 + H5N5E1 ) + 2/2 * ( H5N4E2 ) ) / ( H3N5 + H4N4 + H4N5 + H5N4 + H5N4Am1 + H5N4Am1E1 + H5N4Am2 + H5N4E1 + H5N4E2 + H5N5E1 )
	A2G	A2G = ( 0/2 * ( H3N4F1 + H3N5 + H3N5F1 ) + 1/2 * ( H4N4 + H4N4F1 + H4N5 + H4N5F1 ) + 2/2 * ( H5N4 + H5N4Am1 + H5N4Am1E1 + H5N4Am2 + H5N4E1 + H5N4E2 + H5N4F1 + H5N4F1Am1 + H5N4F1Am1E1 + H5N4F1Am2 + H5N4F1E1 + H5N4F1E2 + H5N5E1 + H5N5F1 + H5N5F1Am1 + H5N5F1Am1E1 + H5N5F1E1 + H5N5F1E2 ) ) / ( H3N4F1 + H3N5 + H3N5F1 + H4N4 + H4N4F1 + H4N5 + H4N5F1 + H5N4 + H5N4Am1 + H5N4Am1E1 + H5N4Am2 + H5N4E1 + H5N…
	A3G	A3G = ( 0/3 * (0) + 1/3 * (0) + 2/3 * (0) + 3/3 * ( H6N5Am1E1 + H6N5Am1E2 + H6N5Am2E1 + H6N5E1 + H6N5E2 + H6N5E3 + H6N5F1Am1E1 + H6N5F1Am1E2 + H6N5F1E2 ) ) / ( H6N5Am1E1 + H6N5Am1E2 + H6N5Am2E1 + H6N5E1 + H6N5E2 + H6N5E3 + H6N5F1Am1E1 + H6N5F1Am1E2 + H6N5F1E2 )
	A4G	A4G = ( 0/4 * (0) + 1/4 * (0) + 2/4 * (0) + 3/4 * (0) + 4/4 * ( H7N6Am1E3 ) ) / ( H7N6Am1E3 )
	A1F	A1F = (0) / (0)
	A3F	A3F = ( H6N5F1Am1E1 + H6N5F1Am1E2 + H6N5F1E2 ) / ( H6N5Am1E1 + H6N5Am1E2 + H6N5Am2E1 + H6N5E1 + H6N5E2 + H6N5E3 + H6N5F1Am1E1 + H6N5F1Am1E2 + H6N5F1E2 )
	A4F	A4F = (0) / ( H7N6Am1E3 )
	A1F0	A1F0 = (0) / (0)
	A2F0	A2F0 = ( H3N5 + H4N4 + H4N5 + H5N4 + H5N4Am1 + H5N4Am1E1 + H5N4Am2 + H5N4E1 + H5N4E2 + H5N5E1 ) / ( H3N4F1 + H3N5 + H3N5F1 + H4N4 + H4N4F1 + H4N5 + H4N5F1 + H5N4 + H5N4Am1 + H5N4Am1E1 + H5N4Am2 + H5N4E1 + H5N4E2 + H5N4F1 + H5N4F1Am1 + H5N4F1Am1E1 + H5N4F1Am2 + H5N4F1E1 + H5N4F1E2 + H5N5E1 + H5N5F1 + H5N5F1Am1 + H5N5F1Am1E1 + H5N5F1E1 + H5N5F1E2 )
	A3F0	A3F0 = ( H6N5Am1E1 + H6N5Am1E2 + H6N5Am2E1 + H6N5E1 + H6N5E2 + H6N5E3 ) / ( H6N5Am1E1 + H6N5Am1E2 + H6N5Am2E1 + H6N5E1 + H6N5E2 + H6N5E3 + H6N5F1Am1E1 + H6N5F1Am1E2 + H6N5F1E2 )
	A4F0	A4F0 = ( H7N6Am1E3 ) / ( H7N6Am1E3 )
	A4S	A4S = ( 0/4 * (0) + 1/4 * (0) + 2/4 * (0) + 3/4 * (0) + 4/4 * ( H7N6Am1E3 ) ) / ( H7N6Am1E3 )
	A2Am	A2Am = ( 0/2 * ( H3N4F1 + H3N5 + H3N5F1 + H4N4 + H4N4F1 + H4N5 + H4N5F1 + H5N4 + H5N4E1 + H5N4E2 + H5N4F1 + H5N4F1E1 + H5N4F1E2 + H5N5E1 + H5N5F1 + H5N5F1E1 + H5N5F1E2 ) + 1/2 * ( H5N4Am1 + H5N4Am1E1 + H5N4F1Am1 + H5N4F1Am1E1 + H5N5F1Am1 + H5N5F1Am1E1 ) + 2/2 * ( H5N4Am2 + H5N4F1Am2 ) ) / ( H3N4F1 + H3N5 + H3N5F1 + H4N4 + H4N4F1 + H4N5 + H4N5F1 + H5N4 + H5N4Am1 + H5N4Am1E1 + H5N4Am2 + H5N4E1 + H5…
	A3Am	A3Am = ( 0/3 * ( H6N5E1 + H6N5E2 + H6N5E3 + H6N5F1E2 ) + 1/3 * ( H6N5Am1E1 + H6N5Am1E2 + H6N5F1Am1E1 + H6N5F1Am1E2 ) + 2/3 * ( H6N5Am2E1 ) + 3/3 * (0) ) / ( H6N5Am1E1 + H6N5Am1E2 + H6N5Am2E1 + H6N5E1 + H6N5E2 + H6N5E3 + H6N5F1Am1E1 + H6N5F1Am1E2 + H6N5F1E2 )
	A4Am	A4Am = ( 0/4 * (0) + 1/4 * ( H7N6Am1E3 ) + 2/4 * (0) + 3/4 * (0) + 4/4 * (0) ) / ( H7N6Am1E3 )
	A4E	A4E = ( 0/4 * (0) + 1/4 * (0) + 2/4 * (0) + 3/4 * ( H7N6Am1E3 ) + 4/4 * (0) ) / ( H7N6Am1E3 )
Derived glycosylation traits	CALN	CAAmN = (0) / ( H3N4F1 + H3N5 + H3N5F1 + H4N4 + H4N4F1 + H4N5 + H4N5F1 + H5N4 + H5N4Am1 + H5N4Am1E1 + H5N4Am2 + H5N4E1 + H5N4E2 + H5N4F1 + H5N4F1Am1 + H5N4F1Am1E1 + H5N4F1Am2 + H5N4F1E1 + H5N4F1E2 + H5N5E1 + H5N5F1 + H5N5F1Am1 + H5N5F1Am1E1 + H5N5F1E1 + H5N5F1E2 + H6N5Am1E1 + H6N5Am1E2 + H6N5Am2E1 + H6N5E1 + H6N5E2 + H6N5E3 + H6N5F1Am1E1 + H6N5F1Am1E2 + H6N5F1E2 + H7N6Am1E3 )
	CA4	CA4 = ( H7N6Am1E3 ) / ( H3N4F1 + H3N5 + H3N5F1 + H4N4 + H4N4F1 + H4N5 + H4N5F1 + H5N4 + H5N4Am1 + H5N4Am1E1 + H5N4Am2 + H5N4E1 + H5N4E2 + H5N4F1 + H5N4F1Am1 + H5N4F1Am1E1 + H5N4F1Am2 + H5N4F1E1 + H5N4F1E2 + H5N5E1 + H5N5F1 + H5N5F1Am1 + H5N5F1Am1E1 + H5N5F1E1 + H5N5F1E2 + H6N5Am1E1 + H6N5Am1E2 + H6N5Am2E1 + H6N5E1 + H6N5E2 + H6N5E3 + H6N5F1Am1E1 + H6N5F1Am1E2 + H6N5F1E2 + H7N6Am1E3 )
	A2F	A2F = ( H3N4F1 + H3N5F1 + H4N4F1 + H4N5F1 + H5N4F1 + H5N4F1Am1 + H5N4F1Am1E1 + H5N4F1Am2 + H5N4F1E1 + H5N4F1E2 + H5N5F1 + H5N5F1Am1 + H5N5F1Am1E1 + H5N5F1E1 + H5N5F1E2 ) / ( H3N4F1 + H3N5 + H3N5F1 + H4N4 + H4N4F1 + H4N5 + H4N5F1 + H5N4 + H5N4Am1 + H5N4Am1E1 + H5N4Am2 + H5N4E1 + H5N4E2 + H5N4F1 + H5N4F1Am1 + H5N4F1Am1E1 + H5N4F1Am2 + H5N4F1E1 + H5N4F1E2 + H5N5E1 + H5N5F1 + H5N5F1Am1 + H5N5F1Am1E1 …
	AG	AG = (CA2*A2G)+(CA3*A3G)+(CA4*A4G)
	A3FG	A3FG = ( 0/3 * (0) + 1/3 * (0) + 2/3 * (0) + 3/3 * ( H6N5F1Am1E1 + H6N5F1Am1E2 + H6N5F1E2 ) ) / ( H6N5F1Am1E1 + H6N5F1Am1E2 + H6N5F1E2 )
	AS	AS = (CA2*A2S)+(CA3*A3S)+(CA4*A4S)
	A2S	A2S = ( 0/2 * ( H3N4F1 + H3N5 + H3N5F1 + H4N4 + H4N4F1 + H4N5 + H4N5F1 + H5N4 + H5N4F1 + H5N5F1 ) + 1/2 * ( H5N4Am1 + H5N4E1 + H5N4F1Am1 + H5N4F1E1 + H5N5E1 + H5N5F1Am1 + H5N5F1E1 ) + 2/2 * ( H5N4Am1E1 + H5N4Am2 + H5N4E2 + H5N4F1Am1E1 + H5N4F1Am2 + H5N4F1E2 + H5N5F1Am1E1 + H5N5F1E2 ) ) / ( H3N4F1 + H3N5 + H3N5F1 + H4N4 + H4N4F1 + H4N5 + H4N5F1 + H5N4 + H5N4Am1 + H5N4Am1E1 + H5N4Am2 + H5N4E1 + H5N…
	A3S	A3S = ( 0/3 * (0) + 1/3 * ( H6N5E1 ) + 2/3 * ( H6N5Am1E1 + H6N5E2 + H6N5F1Am1E1 + H6N5F1E2 ) + 3/3 * ( H6N5Am1E2 + H6N5Am2E1 + H6N5E3 + H6N5F1Am1E2 ) ) / ( H6N5Am1E1 + H6N5Am1E2 + H6N5Am2E1 + H6N5E1 + H6N5E2 + H6N5E3 + H6N5F1Am1E1 + H6N5F1Am1E2 + H6N5F1E2 )
	A3FS	A3FS = ( 0/3 * (0) + 1/3 * (0) + 2/3 * ( H6N5F1Am1E1 + H6N5F1E2 ) + 3/3 * ( H6N5F1Am1E2 ) ) / ( H6N5F1Am1E1 + H6N5F1Am1E2 + H6N5F1E2 )
	A3FAm	A3FAm = ( 0/3 * ( H6N5F1E2 ) + 1/3 * ( H6N5F1Am1E1 + H6N5F1Am1E2 ) + 2/3 * (0) + 3/3 * (0) ) / ( H6N5F1Am1E1 + H6N5F1Am1E2 + H6N5F1E2 )
	AFE	AFE = ((A1FE*A1F)+(A2FE*A2F)+(A3FE*A3F)+(A4FE*A4F))/(A1F+A2F+A3F+A4F)
	AF0E	AF0E = ((A1F0E*A1F0)+(A2F0E*A2F0)+(A3F0E*A3F0)+(A4F0E*A4F0))/(A1F+A2F+A3F+A4F)
	A2E	A2E = ( 0/2 * ( H3N4F1 + H3N5 + H3N5F1 + H4N4 + H4N4F1 + H4N5 + H4N5F1 + H5N4 + H5N4Am1 + H5N4Am2 + H5N4F1 + H5N4F1Am1 + H5N4F1Am2 + H5N5F1 + H5N5F1Am1 ) + 1/2 * ( H5N4Am1E1 + H5N4E1 + H5N4F1Am1E1 + H5N4F1E1 + H5N5E1 + H5N5F1Am1E1 + H5N5F1E1 ) + 2/2 * ( H5N4E2 + H5N4F1E2 + H5N5F1E2 ) ) / ( H3N4F1 + H3N5 + H3N5F1 + H4N4 + H4N4F1 + H4N5 + H4N5F1 + H5N4 + H5N4Am1 + H5N4Am1E1 + H5N4Am2 + H5N4E1 + H5N…
	A3E	A3E = ( 0/3 * (0) + 1/3 * ( H6N5Am1E1 + H6N5Am2E1 + H6N5E1 + H6N5F1Am1E1 ) + 2/3 * ( H6N5Am1E2 + H6N5E2 + H6N5F1Am1E2 + H6N5F1E2 ) + 3/3 * ( H6N5E3 ) ) / ( H6N5Am1E1 + H6N5Am1E2 + H6N5Am2E1 + H6N5E1 + H6N5E2 + H6N5E3 + H6N5F1Am1E1 + H6N5F1Am1E2 + H6N5F1E2 )
	A3FE	A3FE = ( 0/3 * (0) + 1/3 * ( H6N5F1Am1E1 ) + 2/3 * ( H6N5F1Am1E2 + H6N5F1E2 ) + 3/3 * (0) ) / ( H6N5F1Am1E1 + H6N5F1Am1E2 + H6N5F1E2 )
	A3F0E	A3F0E = ( 0/3 * (0) + 1/3 * ( H6N5Am1E1 + H6N5Am2E1 + H6N5E1 ) + 2/3 * ( H6N5Am1E2 + H6N5E2 ) + 3/3 * ( H6N5E3 ) ) / ( H6N5Am1E1 + H6N5Am1E2 + H6N5Am2E1 + H6N5E1 + H6N5E2 + H6N5E3 )
	A4FE	A4FE = ( 0/4 * (0) + 1/4 * (0) + 2/4 * (0) + 3/4 * (0) + 4/4 * (0) ) / ( H7N6Am1E3 )
	A4F0E	A4F0E = ( 0/4 * (0) + 1/4 * (0) + 2/4 * (0) + 3/4 * ( H7N6Am1E3 ) + 4/4 * (0) ) / ( H7N6Am1E3 )

## Sheet: Table S5
			Supplementary Table S5: Analysis of CRC cohort using three quantification methods. Quantification of direct N-glycan traits was carried out using FD, MS and FD-MS in the cohort of CRC patients (n = 64). The average relative abundance values for the pre-operative and post-operative samples are displayed. Alteration in CRC (pre-/post-) as well as post-operation (post-/pre-) is shown. Bonferroni cor…
Peak #	Composition	Glycan	RPLC-FD							RPLC-MS							RPLC-FD-MS
			Average relative abundance		p-value	Alteration in CRC		Alteration post-operation		Average relative abundance		p-value	Alteration in CRC		Alteration post-operation		Average relative abundance		p-value	Alteration in CRC		Alteration post-operation
			Cases pre-operative	Cases post-operative		pre-/post-	Direction	post-/pre-	Direction	Cases pre-operative	Cases post-operative		pre-/post-	Direction	post-/pre-	Direction	Cases pre-operative	Cases post-operative		pre-/post-	Direction	post-/pre-	Direction
1	H8N2		0.0146978	0.0153825	0.00507767	0.955487	down	1.04659	up	0.00435397	0.00457445	0.0441211	0.951801	down	1.05064	up	0.0072556	0.00787356	0.0108361	0.921515	down	1.08517	up
	H9N2									0.0043522	0.00425169	0.703064	1.02364	up	0.976906	down	0.0074387	0.00750771	0.482562	0.990808	down	1.00928	up
2	H7N2		0.00462385	0.00491889	0.00229221	0.940018	down	1.06381	up	0.00325678	0.00353009	0.00910392	0.922578	down	1.08392	up	0.00623602	0.00674723	0.00420642	0.924234	down	1.08198	up
3			0.00161308	0.00182847	0.000110917	0.8822	down	1.13353	up					down	#DIV/0!	#DIV/0!					down	#DIV/0!	#DIV/0!
4	H6N2		0.0116898	0.0126892	0.000481437	0.921241	down	1.08549	up	0.011095	0.011398	0.384642	0.973423	down	1.0273	up	0.0116878	0.0126888	0.00325572	0.921111	down	1.08565	up
5	H5N2		0.0108775	0.0120922	2.91906e-05	0.899552	down	1.11166	up	0.0092182	0.0100902	0.0121481	0.91358	down	1.09459	up	0.0108766	0.0120927	9.93689e-05	0.899436	down	1.11181	up
6	H4N4		0.0320809	0.0317112	0.453857	1.01166	up	0.988477	down	0.00194905	0.00229466	0.00245008	0.849385	down	1.17732	up	0.00431628	0.00465223	0.325576	0.927785	down	1.07784	up
	H5N4S2,31							#DIV/0!	#DIV/0!	0.00865183	0.00928097	0.194502	0.932211	down	1.07272	up	0.0148963	0.015105	0.673527	0.986181	down	1.01401	up
	H5N4							#DIV/0!	#DIV/0!	0.00535206	0.00551832	0.533983	0.969872	down	1.03106	up	0.0128612	0.0119476	0.46604	1.07647	up	0.928964	down
7	H5N4S2,32		0.00426221	0.00415541	0.952006	1.0257	up	0.974942	down	0.012182	0.0113431	0.211094	1.07396	up	0.931136	down	0.00426527	0.00415844	0.711614	1.02569	up	0.974953	down
8	H3N5		0.00333327	0.00329921	0.148598	1.01032	up	0.989782	down	0.00264439	0.00261705	0.789084	1.01044	up	0.989665	down	0.0033344	0.00330018	0.478402	1.01037	up	0.989738	down
9	H4N5		0.00332968	0.00361963	0.000393541	0.919895	down	1.08708	up	0.0044443	0.00449375	0.296832	0.988995	down	1.01113	up	0.00332947	0.00361978	0.00149031	0.919801	down	1.08719	up
10	H5N4F1		0.0495762	0.0582832	1.14923e-05	0.85061	down	1.17563	up	0.0171419	0.020851	2.44502e-05	0.822115	down	1.21637	up	0.0233281	0.028721	9.84999e-06	0.812232	down	1.23118	up
	H4N4F1							#DIV/0!	#DIV/0!	0.0343246	0.0396766	5.36217e-05	0.86511	down	1.15592	up	0.0472396	0.0549	9.9809e-06	0.860466	down	1.16216	up
11	H3N4F1		0.0559819	0.0633446	4.80675e-05	0.883768	down	1.13152	up	0.0251958	0.0273876	0.0229809	0.919972	down	1.08699	up	0.0349718	0.0379723	0.0448294	0.920982	down	1.0858	up
12	H5N4F1S2,31		0.01791	0.018253	0.104149	0.981209	down	1.01915	up	0.00465437	0.00539671	0.00120898	0.862446	down	1.15949	up	0.0179092	0.0182615	0.239195	0.980706	down	1.01967	up
13	H5N4F1S2,32		0.00951722	0.0110763	3.46512e-06	0.859242	down	1.16382	up	0.00373724	0.00417257	0.0292481	0.895669	down	1.11648	up	0.00951477	0.0110772	1.11442e-05	0.858953	down	1.16421	up
14	H5N4S2,61_iso1		0.046176	0.0432963	0.533983	1.06651	up	0.937636	down	0.0253966	0.0244117	0.206252	1.04035	up	0.961217	down	0.0210136	0.0192326	0.00120898	1.0926	up	0.915245	down
	H5N4S2,31S2,61_iso1							#DIV/0!	#DIV/0!	0.0277767	0.0282111	0.663789	0.984602	down	1.01564	up	0.0251725	0.0240692	0.768567	1.04584	up	0.956168	down
15	H5N5F1S2,31		0.0121596	0.0108979	0.115861	1.11578	up	0.896238	down	0.00185156	0.0021072	0.117612	0.87868	down	1.13807	up	0.00469799	0.00441889	0.196812	1.06316	up	0.940592	down
	H6N5S2,32S2,61							#DIV/0!	#DIV/0!	0.00298131	0.00304988	0.565206	0.977517	down	1.023	up	0.00746659	0.00648139	0.00841678	1.152	up	0.868053	down
16	H6N5S2,31S2,61_iso1		0.0151028	0.0137054	0.0172774	1.10196	up	0.907475	down	0.00784418	0.00775779	0.712912	1.01114	up	0.988987	down	0.015106	0.0137061	0.000624623	1.10214	up	0.907329	down
17	H5N5F1		0.0478566	0.0522294	0.000302767	0.916278	down	1.09137	up	0.00558113	0.0066456	1.98627e-06	0.839824	down	1.19073	up	0.0115593	0.012934	0.000846682	0.893714	down	1.11893	up
	H3N5F1							#DIV/0!	#DIV/0!	0.00673837	0.00807013	3.00611e-05	0.834977	down	1.19764	up	0.0136542	0.0155057	0.000393541	0.880593	down	1.1356	up
	H4N5F1							#DIV/0!	#DIV/0!	0.0109578	0.0122516	0.000538798	0.894397	down	1.11807	up	0.0226418	0.0237958	0.0363323	0.951505	down	1.05097	up
18	H6N5F1S2,31S2,61		0.011458	0.00987584	0.00163374	1.16021	up	0.861916	down	0.00405867	0.00312251	3.47128e-07	1.29981	up	0.769344	down	0.00364301	0.00261637	1.08703e-06	1.39239	up	0.71819	down
	H6N5S2,61							#VALUE!	#VALUE!	0.00505205	0.00494687	0.499398	1.02126	up	0.979181	down	0.00435094	0.00399037	0.0264017	1.09036	up	0.917128	down
	H5N3S2,61							#VALUE!	#VALUE!	0.00403461	0.00406321	0.989329	0.99296	down	1.00709	up	0.00346674	0.00326947	0.064248	1.06033	up	0.943099	down
19	H6N5S2,31S2,61_iso2		0.114522	0.113286	0.227206	1.01091	up	0.989205	down	0.00938853	0.00979369	0.284307	0.958631	down	1.04315	up	0.0108124	0.0111656	0.713013	0.968374	down	1.03266	up
	H5N4S2,61_iso2					#DIV/0!		#DIV/0!	#DIV/0!	0.0916378	0.090943	0.983994	1.00764	up	0.992418	down	0.103701	0.102125	0.28649	1.01544	up	0.984797	down
20	H5N4S2,31S2,61_iso2		0.0343081	0.0361256	0.000125428	0.949687	down	1.05298	up	0.0554939	0.0559886	0.791929	0.991165	down	1.00891	up	0.0343081	0.0361285	0.00729316	0.949614	down	1.05306	up
21	H5N5S2,61		0.0113512	0.0115641	0.00438738	0.981592	down	1.01875	up	0.00864123	0.00974723	0.000274761	0.886532	down	1.12799	up	0.0113524	0.011567	0.0557959	0.981452	down	1.0189	up
22	H5N5F1S2,31S2,61		0.00646114	0.00634231	0.63492	1.01874	up	0.981608	down	0.00132808	0.00153416	0.0485168	0.865669	down	1.15518	up	0.00646284	0.00634345	0.504816	1.01882	up	0.981526	down
23	H5N5F1S2,61_iso1		0.00517632	0.00531251	0.0268588	0.974364	down	1.02631	up	0.0023672	0.00258709	0.0214198	0.915007	down	1.09289	up	0.00200052	0.0022992	0.0021922	0.870096	down	1.1493	up
	H6N5S2,31S2,62_iso1					#VALUE!	#VALUE!	#VALUE!	#VALUE!	0.0037334	0.00357288	0.158226	1.04493	up	0.957005	down	0.00317741	0.00301536	0.28764	1.05374	up	0.949001	down
24	H5N4F1S2,61		0.0337289	0.0363405	8.4333e-06	0.928135	down	1.07743	up	0.0243629	0.0273569	0.000413988	0.890556	down	1.12289	up	0.0337263	0.0363414	0.000107917	0.928042	down	1.07754	up
25	H5N4F1S2,31S2,61		0.0535977	0.0434311	6.07308e-07	1.23409	up	0.810316	down	0.00499668	0.00540584	0.0668954	0.924311	down	1.08189	up	0.0107904	0.0110332	0.450669	0.977995	down	1.0225	up
	H6N5S2,62_iso1					#VALUE!		#VALUE!	#VALUE!	0.00889962	0.00772278	0.000145573	1.15239	up	0.867765	down	0.0174467	0.0143386	3.05234e-06	1.21676	up	0.821854	down
	H6N5F1S2,31S2,62_iso1					#VALUE!		#VALUE!	#VALUE!	0.0120001	0.00887113	4.93421e-06	1.35271	up	0.739255	down	0.0253735	0.0180564	1.0478e-05	1.40523	up	0.711627	down
26	H6N5S2,31S2,62_iso2		0.0346814	0.0348755	0.225788	0.994434	down	1.0056	up	0.0261406	0.0262836	0.814936	0.994557	down	1.00547	up	0.0346892	0.0348827	0.842744	0.994452	down	1.00558	up
27	H5N4S2,62		0.258821	0.243417	0.00174954	1.06328	up	0.940482	down	0.40173	0.379704	0.024128	1.05801	up	0.945173	down	0.258809	0.243393	0.000733259	1.06334	up	0.940433	down
28	H6N5S2,62_iso2		0.00457143	0.0044288	0.8936	1.03221	up	0.968799	down	0.0142241	0.0138862	0.46536	1.02434	up	0.976243	down	0.00457187	0.00442872	0.0919401	1.03232	up	0.968688	down
29	H5N5F1S2,61_iso2		0.0228375	0.0265709	4.49075e-08	0.859492	down	1.16348	up	0.0213325	0.0246543	3.46512e-06	0.865264	down	1.15572	up	0.0228372	0.0265725	2.73954e-08	0.859428	down	1.16356	up
30	H7N6S2,31S2,63		0.00414085	0.00409492	0.625417	1.01122	up	0.988906	down	0.00104203	0.000865655	0.0242157	1.20375	up	0.830736	down	0.00170109	0.00149805	0.0375426	1.13554	up	0.88064	down
	H6N5F1S2,62					#VALUE!	#VALUE!	#VALUE!	#VALUE!	0.000788352	0.000803203	0.578852	0.98151	down	1.01884	up	0.00129554	0.00135879	0.262396	0.953456	down	1.04882	up
	H6N5F1S2,31S2,62_iso2					#VALUE!	#VALUE!	#VALUE!	#VALUE!	0.000718078	0.000755803	0.366625	0.950087	down	1.05254	up	0.00114639	0.00123983	0.0557959	0.924635	down	1.08151	up
31	H5N4F1S2,62		0.0297947	0.0304912	0.0844597	0.977158	down	1.02338	up	0.0280126	0.0293407	0.503655	0.954735	down	1.04741	up	0.0297976	0.0305004	0.888314	0.976958	down	1.02359	up
32	H6N5S2,63		0.0143443	0.0122348	0.000714699	1.17241	up	0.852941	down	0.0104266	0.00900985	0.00339915	1.15724	up	0.864123	down	0.014349	0.0122367	0.000457891	1.17262	up	0.852795	down
33	H5N5F1S2,62		0.0194165	0.0208264	5.51713e-05	0.9323	down	1.07262	up	0.017909	0.0196586	0.00429604	0.910999	down	1.0977	up	0.0194172	0.0208311	0.00370343	0.932126	down	1.07282	up
Summary			Sum							Sum							Sum
			1	1						1	1						1	1

## Sheet: Table S6
Supplementary Table S6: Comparison of RPLC-FD-MS and MALDI-MS direct N-glycan trait results. The average relative abundance values for the pre-operative (n = 64) and post-operative (n = 64) samples are displayed. Alteration in CRC (pre-/post-) is shown. N-glycans in the FD-MS dataset were considered to be statistically significant with a p-value < 0.001 (colored in green). The MALDI-MS data has p…
Composition	RPLC-FD-MS										MALDI-MS pre-/post-operative validation (de Vroome et al. 2018)1						Summary
	Average relative abundance				p-value	Significance	Alteration in CRC				Average relative abundance		p-value	Significance	Alteration in CRC		Alteration comparison		Significance comparison		Validated (Vroome et al. 2018)	Significant & Validated
	Cases pre-operative		Cases post-operative				pre-/post-		Direction		Cases pre-operative	Cases post-operative			pre-/post-	Direction
H6N5F1S2,31S2,61	0.00364301		0.00261637		1.08703e-06	Sig	1.39239		up		0.00292487	0.00249937	4.51381e-06	Sig	1.17024	up	Same		Sig		Y	Y
H5N4F1	0.0233281		0.028721		9.84999e-06	Sig	0.812232		down		0.0130585	0.0152666	0.00392803	Sig	0.855365	down	Same		Sig		Y	Y
H4N4F1	0.0472396		0.0549		9.9809e-06	Sig	0.860466		down	down	0.0227551	0.0272149	0.00137463	Sig	0.836127	down	Same		Sig		Y	Y
H5N4F1S2,32	0.00951477		0.0110772		1.11442e-05	Sig	0.858953		down	down	0.00986577	0.0104917	0.0778379		0.940338	down	Same		New		Y	Y
H5N2	0.0108766		0.0120927		9.93689e-05	Sig	0.899436		down	down	0.00145267	0.00166893	0.166762		0.870419	down	Same		New
H5N4F1S2,61	0.0337263		0.0363414		0.000107917	Sig	0.928042		down	down	0.0222135	0.0251713	0.000572877	Sig	0.882492	down	Same		Sig		Y	Y
H3N5F1	0.0136542		0.0155057		0.000393541	Sig	0.880593		down	down	0.00399748	0.00488138	0.000119878	Sig	0.818923	down	Same		Sig
H6N5S2,63	0.014349		0.0122367		0.000457891	Sig	1.17262		up	up	0.0175532	0.0155261	0.000103477	Sig	1.13056	up	Same		Sig		Y	Y
H5N4S2,62	0.258809		0.243393		0.000733259	Sig	1.06334		up	up	0.450988	0.434599	0.00167532	Sig	1.03771	up	Same		Sig
H5N5F1	0.0115593		0.012934		0.000846682	Sig	0.893714		down	down	0.00407917	0.00474516	0.000195882	Sig	0.859649	down	Same		Sig		Y	Y
H4N5	0.00332947		0.00361978		0.00149031		0.919801		down	down	0.00155503	0.00171088	0.0402979		0.908908	down	Same		Not Sig
H6N2	0.0116878		0.0126888		0.00325572		0.921111		down	down	0.00390617	0.00430406	0.0486471		0.907555	down	Same		Not Sig
H5N5F1S2,62	0.0194172		0.0208311		0.00370343		0.932126		down	down	0.014402	0.0163258	0.000100462	Sig	0.882163	down	Same		Not Found
H7N2	0.00623602		0.00674723		0.00420642		0.924234		down	down	0.00254126	0.00263188	0.402709		0.965568	down	Same		Not Sig
H6N5S2,32S2,61	0.00746659		0.00648139		0.00841678		1.152		up	up	0.0057448	0.006083	0.119929		0.944403	down	Other		Not Sig
H8N2	0.0072556		0.00787356		0.0108361		0.921515		down	down	0.00588977	0.00602236	0.419055		0.977984	down	Same		Not Sig
H6N5S2,61	0.00435094		0.00399037		0.0264017		1.09036		up	up	0.00949028	0.00929654	0.226165		1.02084	up	Same		Not Sig
H4N5F1	0.0226418		0.0237958		0.0363323		0.951505		down	down	0.00831652	0.00999805	0.000146992	Sig	0.831814	down	Same		Not Found		Y
H7N6S2,31S2,63	0.00170109		0.00149805		0.0375426		1.13554		up	up	0.000820278	0.000748428	0.0369246		1.096	up	Same		Not Sig
H3N4F1	0.0349718		0.0379723		0.0448294		0.920982		down	down	0.0113107	0.0124017	0.156016		0.912028	down	Same		Not Sig
H5N5S2,61	0.0113524		0.011567		0.0557959		0.981452		down	down	0.0045841	0.00527849	0.00159494	Sig	0.868449	down	Same		Not Found
H5N3S2,61	0.00346674		0.00326947		0.064248		1.06033		up	up	0.00196713	0.0021244	0.0574536		0.925971	down	Other		Not Sig
H5N5F1S2,31	0.00469799		0.00441889		0.196812		1.06316		up	up	n.d.	n.d.	n.d.	n.d.	n.d.	n.d.	n/a		n/a
H5N4F1S2,31	0.0179092		0.0182615		0.239195		0.980706		down	down	0.00574766	0.00668924	1.12175e-05	Sig	0.85924	down	Same		Not Found		Y
H6N5F1S2,62	0.00129554		0.00135879		0.262396		0.953456		down	down	0.00308624	0.00269806	1.41199e-05	Sig	1.14388	up	Other		Not Found
H4N4	0.00431628		0.00465223		0.325576		0.927785		down	down	0.00201243	0.00214673	0.210062		0.937437	down	Same		Not Sig
H5N4F1S2,31S2,61	0.0107904		0.0110332		0.450669		0.977995		down	down	0.0152171	0.0132091	5.54315e-06	Sig	1.15201	up	Other		Not Found
H5N4	0.0128612		0.0119476		0.46604		1.07647		up	up	0.00220432	0.00251224	0.00745992	Sig	0.877433	down	Other		Not Found		Y
H3N5	0.0033344		0.00330018		0.478402		1.01037		up	up	n.d.	n.d.	n.d.	n.d.	n.d.	n.d.	n/a		n/a
H9N2	0.0074387		0.00750771		0.482562		0.990808		down	down	0.0087734	0.00904656	0.282901		0.969806	down	Same		Not Sig
H5N5F1S2,31S2,61	0.00646284		0.00634345		0.504816		1.01882		up	up	0.00108263	0.00112371	0.448581		0.963436	down	Other		Not Sig
H5N4S2,31	0.0148963		0.015105		0.673527		0.986181		down	down	0.00327192	0.00366619	0.00224109	Sig	0.892457	down	Same		Not Found
H5N4S2,32	0.00426527		0.00415844		0.711614		1.02569		up	up	0.00584049	0.00619257	0.0136143		0.943145	down	Other		Not Sig
H5N4F1S2,62	0.0297976		0.0305004		0.888314		0.976958		down	down	0.0317048	0.0323228	0.114883		0.980881	down	Same		Not Sig
Isomers	Individual	Summed	Individual	Summed			Individual	Summed	Individual	Summed
H6N5S2,62_iso1	0.0174467	0.0220185	0.0143386	0.0187673	3.05234e-06	Sig	1.21676	1.17324	up	up	0.00633555	0.00629402	0.35977		1.0066	up	Same		New
H6N5S2,62_iso2	0.00457187		0.00442872		0.0919401		1.03232		up			#N/A
H6N5F1S2,31S2,62_iso1	0.0253735	0.0265199	0.0180564	0.0192963	1.0478e-05	Sig	1.40523	1.37435	up	up	0.0281455	0.0213073	2.46e-07	Sig	1.32093	up	Same		Sig		Y	Y
H6N5F1S2,31S2,62_iso2	0.00114639		0.00123983		0.0557959		0.924635		down		#N/A	#N/A
H6N5S2,31S2,61_iso1	0.015106	0.0259184	0.0137061	0.0248717	0.000624623	Sig	1.10214	1.04209	up	up	0.00716558	0.00740409	0.627792		0.967788	down	Other		New
H6N5S2,31S2,61_iso2	0.0108124		0.0111656		0.713013		0.968374		down		#N/A	#N/A
H5N4S2,61_iso1	0.0210136	0.124715	0.0192326	0.121357	0.00120898		1.0926	1.02767	up	up	0.0657066	0.0695217	0.0182975		0.945124	down	Other		Not Sig
H5N4S2,61_iso2	0.103701		0.102125		0.28649		1.01544		up		#N/A	#N/A
H5N5F1S2,61_iso1	0.00200052	0.0248377	0.0022992	0.0288717	0.0021922		0.870096	0.860278	down	down	0.0149499	0.0174052	3.8e-05	Sig	0.858933	down	Same		Sig
H5N5F1S2,61_iso2	0.0228372		0.0265725		2.73954e-08	Sig	0.859428		down		#N/A	#N/A
H5N4S2,31S2,61_iso1	0.0251725	0.0594807	0.0240692	0.0601977	0.768567		1.04584	0.988089	up	down	0.0462485	0.0482511	0.0100233		0.958497	down	Same		Not Sig
H5N4S2,31S2,61_iso2	0.0343081		0.0361285		0.00729316		0.949614		down		#N/A	#N/A
H6N5S2,31S2,62_iso1	0.00317741	0.0378666	0.00301536	0.0378981	0.28764		1.05374	0.999169	up	down	0.0348846	0.0369608	0.0503115		0.943826	down	Same		Not Sig
H6N5S2,31S2,62_iso2	0.0346892		0.0348827		0.842744		0.994452		down
Summary	Sum					Count								Count			Count
	1	1	1	1		14	48	41						18	39		Same	30	Sig	10	11	8
																	Other	9	New	4
																			Not Found	8
																			Not Sig	17

## Sheet: Table S7
Supplementary Table S7: Comparison of RPLC-FD-MS and MALDI-MS derived glycosylation trait results. Derived glycosylation traits were calculated according to Supplementary Table S4. The average relative abundance values for the pre-operative (n = 64) and post-operative (n = 64) samples are displayed. Alteration in CRC (pre-/post-) is shown. Derived traits in the FD-MS dataset were considered to be…
Trait	Description	RPLC-FD-MS						MALDI-MS pre-/post-operative validation (de Vroome et al. 2018)1						Summary
		Average relative abundance		p-value	Significance	Alteration in CRC		Average relative abundance		p-value	Significance	Alteration in CRC		Alteration comparison		Significance comparison		Validated (Vroome et al. 2018)	Significant & Validated
		Cases pre-operative	Cases post-operative			pre-/post-	Direction	Cases pre-operative	Cases post-operative			pre-/post-	Direction
CALN	LacNac repeats species in complex type	n.d.	n.d.	n.d.	n.d.	n.d.	n.d.	0.000908269	0.000739627	3.24952e-05	Sig	1.22801	up	n/a		n/a		Y
CA4	tetraantennary species in complex type	0.00178296	0.00157539	0.0369332		1.13176	up	0.0246926	0.0229588	0.00600677	Sig	1.07552	up	Same		Not Found		Y
A2F	fucosylation of diantennary glycans	0.383844	0.415652	6.55218e-08	Sig	0.923474	down	0.207994	0.220262	0.00812447	Sig	0.944304	down	Same	New	Sig		Y	Y
AG	galactosylation per antenna across all glycan species	0.904808	0.894455	4.19129e-05	Sig	1.01157	up	0.919909	0.914158	0.00562355	Sig	1.00629	up	Same	Sig	Sig		Y	Y
A3FG	galactosylation of fucosylated triantennary glycans	n/a	n/a	n/a	n/a	n/a	n/a	0.727782	0.691754	1.63079e-06	Sig	1.05208	up	n/a	Not Found	n/a		Y
AS	N-acetylneuraminic acid sialylation per antenna across all glycan species	0.670599	0.648441	3.85618e-06	Sig	1.03417	up	0.806181	0.788718	0.00171689	Sig	1.02214	up	Same	Sig	Sig		Y	Y
A2S	N-acetylneuraminic acids per diantennary glycan	0.637503	0.61625	8.39781e-06	Sig	1.03449	up	0.845204	0.830823	0.00684454	Sig	1.01731	up	Same	Sig	Sig		Y	Y
A3S	N-acetylneuraminic acids per triantennary glycan	0.855362	0.854073	0.514734		1.00151	up	0.68504	0.652467	0.000109765	Sig	1.04992	up	Same	Not Found	Not Found		Y
A3FS	N-acetylneuraminic acids per fucosylated triantennary glycan	0.943214	0.938267	0.0763632		1.00527	up	0.584846	0.528536	5.05136e-07	Sig	1.10654	up	Same	Not Found	Not Found		Y
A3FAm	α2,3-N-acetylneuraminic acids per fucosylated triantennary glycan	0.315787	0.309605	0.000175647	Sig	1.01997	up	0.151519	0.124453	1.67095e-07	Sig	1.21748	up	Same	Sig	Sig		Y	Y
AFE	α2,6-N-acetylneuraminic acids per fucosylated glycan	0.402681	0.377936	4.19388e-05	Sig	1.06547	up	1.01056	0.951845	0.000213299	Sig	1.06168	up	Same	Sig	Sig		Y	Y
AF0E	α2,6-N-acetylneuraminic acids per nonfucosylated glycan	0.691488	0.686624	0.0394061		1.00708	up	1.87024	1.84187	6.40922e-05	Sig	1.0154	up	Same	Not Found	Not Found		Y
A2E	α2,6-N-acetylneuraminic acids per diantennary glycan	0.549777	0.527395	0.000126587	Sig	1.04244	up	0.770614	0.75423	0.00229537	Sig	1.02172	up	Same	Sig	Sig		Y	Y
A3E	α2,6-N-acetylneuraminic acids per triantennary glycan	0.602916	0.598952	0.142578		1.00662	up	0.511011	0.489625	6.21758e-05	Sig	1.04368	up	Same	Not Found	Not Found		Y
A3FE	α2,6-N-acetylneuraminic acids per fucosylated triantennary glycan	0.627426	0.628662	0.789084		0.998035	down	0.433327	0.404083	2.97707e-06	Sig	1.07237	up	Other	Not Found	Not Found		Y
A3F0E	α2,6-N-acetylneuraminic acids per nonfucosylated triantennary glycan	0.596097	0.5923	0.206141		1.00641	up	0.595627	0.582221	0.000604081	Sig	1.02303	up	Same	Not Found	Not Found		Y
A4FE	α2,6-N-acetylneuraminic acids per fucosylated tetraantennary glycan	n.d.	n.d.	n.d.	n.d.	n.d.	n.d.	0.200243	0.19066	6.40922e-05	Sig	1.05026	up	n/a	Not Found	n/a		Y
A4F0E	α2,6-N-acetylneuraminic acids per nonfucosylated tetraantennary glycan	n/a	n/a	n/a	n/a	n/a	n/a	0.399278	0.393078	0.000572877	Sig	1.01577	up	n/a	Not Found	n/a		Y
Summary					Count						Count			Count
					7	14					18	18		Same	13	Sig	7	18	7
														Other	1	New	0
																Not Found	7
																Not Sig	0

## Sheet: Table S8
Supplementary Table S8: Diagnostic performance of RPLC- (FD, MS, FD-MS) and MALDI-MS results for discriminating CRC disease categories. Only FD peaks and N-glycans that showed significance based on the Kruskal-Wallis test for histological type, pT, and stage are shown. Multiple models including random forest, logistic regression, gaussian, and linear discriminant analysis were tested, and the bes…
Category	Peak	RPLC-FD (n = 64)	Direct glycan traits	RPLC-MS (n = 64)	RPLC-FD-MS (n = 64)	MALDI-MS pre-/post-operative validation (n = 64, de Vroome et al. 2018)1	MALDI-MS discovery and validation (n = 180, de Vroome et al. 2018)1
		AUC		AUC	AUC	AUC	AUC
Histological type1	10	0.79	H5N4F1	0.7	0.79	0.79	0.6
			H4N4F1	0.72	0.71	0.77	n.s.
	n.d.	n.d.	H5N4F1S2,61	0.7	0.8	0.76	0.56
	n.d.	n.d.	Combination	0.68	0.828	0.768	0.6
pT2	n.s.	n.s.	H5N4F1	n.s.	n.s.	0.5	0.477
			H4N4F1	n.s.	n.s.	0.586	0.478
			H5N5F1	n.s.	n.s.	0.56	0.465
			H5N4F1S2,61	n.s.	n.s.	n.s.	0.51
			Combination	n.s.	n.s.	0.53	0.53
Stage3	n.s.	n.s.	H5N4F1S2,61	n.s.	n.s.	n.s.	0.49
Legend
1 Adenocarcinoma vs. mucinous adenocarcinoma and signet-ring cell carcinoma
2 pT3 vs. pT1, pT2, and pT4
3 Stage 2 vs. stage 1, stage 3, and stage 4

## Sheet: Table S9
Supplementary Table S9: Clinical characteristics of the discovery and validation CRC cohort. There were a total of 185 cases and 185 controls. Full metadata was collected for 180 cases in three categories of the disease: stage (1 – 4), local extent of tumor assessed pathologically (pT1 – 4), and histological type (Signet-ring cell carcinoma, >50% signet-ring cells; adenocarcinoma, and mucinous ad…
MALDI-MS discovery and validation (de Vroome et al. 2018)1		Cases (n = 185)	Controls (n = 185)
Female sex, n (%)		84 (45.4)	84 (45.4)
Age in years, mean (Std)		66.7 (13.3)	63.0 (10.6)
Stage, n (%)	1	34 (18.9)	n/a
	2	68 (37.8)	n/a
	3	52 (28.9)	n/a
	4	26 (14.4)	n/a
pT, n (%)	pT1	16 (8.9)	n/a
	pT2	26 (14.4)	n/a
	pT3	111 (61.7)	n/a
	pT4	27 (15.0)	n/a
Histological type, n (%)	Signet-ring cell carcinoma	5 (2.8)	n/a
	Adenocarcinoma	154 (85.6)	n/a
	Mucinous adenocarcinoma	21 (11.7)	n/a
